# Supplementary material
Source: HighWire-hosted journal article supplement (https://www.cmaj.ca/highwire/filestream/59165/field_highwire_adjunct_files/0/lung-liu-1-at.pdf)
Supplement: lung-liu-1-at.pdf [file lung-liu-1-at.pdf]

## Appendix 1 (as supplied by the authors): Search strategy

### Source: PubMed

Searched on: September 12, 2014

Results: 639

| Search | Query                                                                                                                                                                                                                   | Results |
|--------|-------------------------------------------------------------------------------------------------------------------------------------------------------------------------------------------------------------------------|---------|
| #1     | low* tidal[Title/Abstract]                                                                                                                                                                                              | 7085    |
| #2     | protective ventilation[Title/Abstract]                                                                                                                                                                                  | 544     |
| #3     | protective mechanical ventilation[Title/Abstract]                                                                                                                                                                       | 110     |
| #4     | #1 OR #2 OR #3                                                                                                                                                                                                          | 7516    |
| #5     | (surgery[Title/Abstract]) OR surgical[Title/Abstract]                                                                                                                                                                   | 1251945 |
| #6     | ((operati*[Title/Abstract]) OR postoperati*[Title/Abstract]) OR<br>post-operati*[Title/Abstract]                                                                                                                        | 883551  |
| #7     | ((anaesthesia[Title/Abstract]) OR anesthesia[Title/Abstract]) OR<br>anaesthetic[Title/Abstract]) OR anesthetic[Title/Abstract]                                                                                          | 203293  |
| #8     | #5 OR #6 OR #7                                                                                                                                                                                                          | 1883440 |
| #9     | (((((randomized controlled trial [pt]) OR groups [tiab]) OR trial [tiab]) OR<br>placebo [tiab]) OR controlled clinical trial [pt]) OR randomized [tiab]) OR<br>randomly [tiab])) NOT ((animals [mh] NOT humans [mh])))) | 1737455 |
| #10    | #4 AND #8 AND #9                                                                                                                                                                                                        | 639     |

### Source: Cochrane Central Register of Controlled Trials

Searched on: September 12, 2014

Results: 67

| Search | Query                                                                                                                         | Results |
|--------|-------------------------------------------------------------------------------------------------------------------------------|---------|
| #1     | "low tidal" or "lower tidal" or "protective ventilation" or "protective<br>mechanical ventilation":ti,ab,kw                   | 161     |
| #2     | surgery or surgical or operati* or postoperati* or post-operati* or anaesthesia<br>or anesthesia or anaesthetic or anesthetic | 166619  |
| #3     | #1 and #2 in Trials                                                                                                           | 67      |

Appendix to: Gu WJ, Wang F, Liu JC. Effect of lung-protective ventilation with lower tidal volumes on clinical outcomes among patients undergoing surgery: a meta-analysis of randomized controlled trials. *CMAJ* 2014. DOI:10.1503/cmaj.141005.

Copyright © 2015 The Author(s) or their employer(s).

To receive this resource in an accessible format, please contact us at [cmajgroup@cmaj.ca](mailto:cmajgroup@cmaj.ca)

**Source: Embase**

**Searched on:** September 12, 2014

**Results: 58**

| <b>Search</b> | <b>Query</b>                                                                    | <b>Results</b> |
|---------------|---------------------------------------------------------------------------------|----------------|
| #1            | 'low tidal'                                                                     | 1039           |
| #2            | 'lower tidal'                                                                   | 268            |
| #3            | 'protective ventilation'                                                        | 882            |
| #4            | 'protective mechanical ventilation'                                             | 180            |
| #5            | #1 OR #2 OR #3 OR #4                                                            | 2079           |
| #6            | 'surgery'/exp OR surgery                                                        | 4650181        |
| #7            | surgical                                                                        | 1307331        |
| #8            | 'operation'/exp OR operation                                                    | 3610209        |
| #9            | operative                                                                       | 286343         |
| #10           | postoperative                                                                   | 706335         |
| #11           | postoperation                                                                   | 2315           |
| #12           | 'post operation'                                                                | 3200           |
| #13           | 'post operative'                                                                | 65743          |
| #14           | 'anaesthesia'/exp OR anaesthesia                                                | 337615         |
| #15           | 'anesthesia'/exp OR anesthesia                                                  | 378072         |
| #16           | 'anesthetic'/exp OR anesthetic                                                  | 281635         |
| #17           | 'anaesthetic'/exp OR anaesthetic                                                | 250370         |
| #18           | #6 OR #7 OR #8 OR #9 OR #10 OR #11 OR #12 OR #13 OR #14 OR #15<br>OR #16 OR #17 | 5329549        |
| #19           | #5 AND #18                                                                      | 889            |
| #20           | #19 AND [randomized controlled trial]/lim AND [humans]/lim                      | 58             |
